# Supplementary material for: Conflicts in Mitochondrial Phylogenomics of Branchiopoda, with the First Complete Mitogenome of Laevicaudata (Crustacea: Branchiopoda)
Source: MDPI journal article supplement (doi:10.3390/cimb45020054), 2023-01-18
Supplement: s1 [file s1]

**Table S3.** Partition schemes and best-fitting models for phylogenetic analyses

| Datasets                                        |                                          | Phylogenetic Reconstruction Approaches |                    |
|-------------------------------------------------|------------------------------------------|----------------------------------------|--------------------|
|                                                 |                                          | Maximum Likelihood                     | Bayesian Inference |
|                                                 |                                          | Best-fitting model                     | Best-fitting model |
| Amino acid<br>datasets<br>43taxa<br>2,043 sites | <i>cox1</i>                              | mtART+I+G+F                            | RtREV+I+G+F        |
|                                                 | <i>cox2</i>                              | mtART+I +G+F                           | mtART+I+G+F        |
|                                                 | <i>cox3</i>                              | mtART+I +G+F                           | mtREV+I+G+F        |
|                                                 | <i>cytb</i>                              | mtART+I +G +F                          | mtREV+I+G+F        |
|                                                 | <i>atp6</i>                              | mtART+I +G+F                           | RtREV+I+G+F        |
|                                                 | <i>nad1</i>                              | mtART+I +G+F                           | mtREV+I+G          |
|                                                 | <i>nad3</i>                              | mtART+I +G                             | mtREV+I+G+F        |
| Nucleotide<br>datasets<br>43taxa<br>3,464 sites | The 1 <sup>st</sup> codon of <i>cox1</i> | SYM+G+I                                | SYM+G+I            |
|                                                 | The 2 <sup>nd</sup> codon of <i>cox1</i> | GTR+G+I                                | GTR+G+I            |
|                                                 | The 1 <sup>st</sup> codon of <i>cox2</i> | GTR +G+I                               | GTR+G+I            |
|                                                 | The 2 <sup>nd</sup> codon of <i>cox2</i> | GTR +G+I                               | GTR+G+I            |
|                                                 | The 1 <sup>st</sup> codon of <i>cox3</i> | GTR+G+I                                | GTR+G+I            |
|                                                 | The 2 <sup>nd</sup> codon of <i>cox3</i> | GTR+G+I                                | GTR+G+I            |
|                                                 | The 1 <sup>st</sup> codon of <i>cytb</i> | GTR+G+I                                | GTR +G+I           |
|                                                 | The 2 <sup>nd</sup> codon of <i>cytb</i> | GTR+G+I                                | GTR+G+I            |
|                                                 | The 1 <sup>st</sup> codon of <i>atp6</i> | GTR+G+I                                | GTR+G+I            |
|                                                 | The 2 <sup>nd</sup> codon of <i>atp6</i> | GTR+G+I                                | GTR+G+I            |
|                                                 | The 1 <sup>st</sup> codon of <i>nad3</i> | HKY+G+I                                | HKY+G+I            |
|                                                 | The 2 <sup>nd</sup> codon of <i>nad3</i> | GTR+G+I                                | GTR+G+I            |
