# Supplementary material for: Conflicts in Mitochondrial Phylogenomics of Branchiopoda, with the First Complete Mitogenome of Laevicaudata (Crustacea: Branchiopoda)
Source: MDPI journal article supplement (doi:10.3390/cimb45020054), 2023-01-18
Supplement: s1 [file s1]

**Figure S1.** Phylogenetic trees of Branchiopoda (colour-coded) obtained with RAxML and MrBayes inferred from the datasets of Pnuc6 (a) and Paa7 (b). Supports at nodes were ML bootstrap values and Bayesian posterior probabilities.
