# Supplementary material for: Conflicts in Mitochondrial Phylogenomics of Branchiopoda, with the First Complete Mitogenome of Laevicaudata (Crustacea: Branchiopoda)
Source: MDPI journal article supplement (doi:10.3390/cimb45020054), 2023-01-18
Supplement: s1 [file s1]

**Table S1.** List of primer combinations used to amplify the mitochondrial genome of *Lynceus grossipedia*

| Fragment | Region           | Primer pair | Primer sequence (5'–3') |
|----------|------------------|-------------|-------------------------|
| LGS 1    | <i>cox1</i>      | LGS 1F      | CTGATATAGCTTTTCCTCG     |
|          |                  | LGS 1R      | AATTTTAATACCAGTAGGTAC   |
| LGS 2    | <i>cox1-atp6</i> | LGS 2F      | TGGGATAATCTATGCTATAT    |
|          |                  | LGS 2R      | AACTCAAAAAAGGGGTAAAAT   |
| LGS 3    | <i>atp6</i>      | LGS 3F      | CTATTTCAATCATTTGACCCC   |
|          |                  | LGS 3R      | GCAGCTAATCGCACGGCTAA    |
| LGS 4    | <i>atp6-cox3</i> | LGS 4F      | AAAAGTGTAGAAATATTAGCCC  |
|          |                  | LGS 4R      | AAAGGCTCAGAAGAAGGAAAC   |
| LGS 5    | <i>cox3</i>      | LGS 5F      | TCAATGATGACGAGATATTAC   |
|          |                  | LGS 5R      | CAAACAACATCAACAAAATGTC  |
| LGS 6    | <i>cox3-nad4</i> | LGS 6F      | CTTATTGGTTCAACATTTTTTA  |
|          |                  | LGS 6R      | AGGTTGATACCCCCAACCAA    |
| LGS 7    | <i>Nad4</i>      | LGS 7F      | GGGGATACAACCTGAACGG     |
|          |                  | LGS 7R      | TACAGGAGCTTCAACATGA     |
| LGS8     | <i>nad4-cytb</i> | LGS 8F      | ATGATTTTAGCTGGTATTTT    |
|          |                  | LGS 8R      | GAAAAAAATCGATTTAAGGT    |
| LGS9     | <i>cytb</i>      | LGS 9F      | GGTTATGTTCTCCCTTGAG     |
|          |                  | LGS 9R      | CATTCTGGTTGAATGTGAGT    |
| LGS10    | <i>cytb-16S</i>  | LGS 10F     | GTTTATATTATGGGTCATATA   |
|          |                  | LGS 10R     | CACCGGTCTGAACTCAGATC    |
| LGS11    | <i>16S</i>       | LGS 11F     | AGACCGGTGTGAGCCAGG      |
|          |                  | LGS 11R     | TCACCGGGCAGGTATTACCT    |
| LGS12    | <i>16S-12S</i>   | LGS 12F     | TTGTCTTTTAATTGAAGACTG   |
|          |                  | LGS 12R     | ACTATCATTTACTGAACAGG    |
| LGS13    | <i>12S</i>       | LGS 13F     | ATCAGTTTAGAGGAACCTG     |
|          |                  | LGS 13R     | CTACTATGTTACGACTTATCTC  |
| LGS14    | <i>12S-cox1</i>  | LGS 14F     | CTAGGATTAGATACCCTATTA   |
|          |                  | LGS 14R     | TATTACTAGATAAAGGAGGG    |
