# Supplementary material for: Conflicts in Mitochondrial Phylogenomics of Branchiopoda, with the First Complete Mitogenome of Laevicaudata (Crustacea: Branchiopoda)
Source: MDPI journal article supplement (doi:10.3390/cimb45020054), 2023-01-18
Supplement: s1 [file s1]

**Table S2.** Details of species and mitogenomes of Branchiopoda used in this study.

| Family           | Genus                | Species                                                                    | Length<br>(bp) | Accession<br>ID | Reference       |
|------------------|----------------------|----------------------------------------------------------------------------|----------------|-----------------|-----------------|
| Chydoridae       | <i>Chydorus</i>      | <i>Chydorus sphaericus</i><br>(O.F.Müller, 1776)                           | 15,959         | MT872704        | No<br>reference |
| Eurycercidae     | <i>Eurycercus</i>    | <i>Eurycercus lamellatus</i><br>(O.F.Müller, 1776)                         | 15,775         | MT872696        | No<br>reference |
| Daphniidae       | <i>Daphnia</i>       | <i>Daphnia tibetana</i><br>(Sars, 1903)                                    | 16,196         | MW981579        | No<br>reference |
|                  |                      | <i>Daphnia pulex</i><br>O.F.Müller, 1776                                   | 15,333         | AF117817        | 67              |
|                  |                      | <i>Daphnia carinata</i><br>King, 1853                                      | 15,245         | NC_028152       | 68              |
|                  |                      | <i>Daphnia magna</i><br>Straus, 1820                                       | 14,948         | NC_026914       | 69              |
|                  |                      | <i>Ceriodaphnia dubia</i><br>Richard, 1894                                 | 14,628         | LC705054        | No<br>reference |
|                  | <i>Ceriodaphnia</i>  |                                                                            |                |                 |                 |
| Moinidae         | <i>Moina</i>         | <i>Moina macrocopa</i><br>(Straus, 1820)                                   | 16,072         | MZ982313        | No<br>reference |
| Bosminidae       | <i>Bosmina</i>       | <i>Bosmina fatalis</i><br>Burckhardt, 1924                                 | 15,209         | MW770308        | No<br>reference |
| Sididae          | <i>Sida</i>          | <i>Sida crystallina</i><br>(O.F.Müller, 1776)                              | 16,072         | MT872684        | No<br>reference |
|                  | <i>Diaphanosoma</i>  | <i>Diaphanosoma excisum</i> Sars 1885                                      | 17,615         | MW476927        | No<br>reference |
| Leptodoridae     | <i>Leptodora</i>     | <i>Leptodora kindti</i><br>(Focke, 1844)                                   | 15,860         | MT872700        | No<br>reference |
| Polyphemidae     | <i>Polyphemus</i>    | <i>Polyphemus pediculus</i><br>(Linnaeus, 1761)                            | 13,456         | MT862416        | No<br>reference |
| Lynceidae        | <i>Lynceus</i>       | <i>Lynceus grossipedia</i><br>Sigvardt et al., 2020                        | 15,121         | OP746066        | This study      |
| Thamnocephalidae | <i>Branchinella</i>  | <i>Branchinella kugenumaensis</i><br>(Ishikawa, 1895)<br>(Japan)           | 14,123         | MW136376        | 38              |
|                  |                      | <i>Branchinella kugenumaensis</i><br>(Ishikawa, 1895)<br>(Zhejiang, China) | 15,127         | MN660045        | 70              |
|                  |                      | <i>Branchinella kugenumaensis</i><br>(Ishikawa, 1895)<br>(Jiangsu, China)  | 14,126         | OP133270        | 36              |
|                  |                      |                                                                            |                |                 |                 |
|                  | <i>Phallocryptus</i> | <i>Phallocryptus</i>                                                       | 16,493         | KP273592        | 71              |

|                       |                              |                                                                                              |        |                |                 |
|-----------------------|------------------------------|----------------------------------------------------------------------------------------------|--------|----------------|-----------------|
|                       |                              | <i>tserensodnomi</i> Alonso & Ventura, 2013                                                  |        |                |                 |
| Streptoceph<br>alidae | <i>Streptocephalu<br/>s</i>  | <i>Streptocephalus cafer</i><br>(Lovén, 1847)                                                | 17,020 | MN720104       | 72              |
|                       |                              | <i>Streptocephalus<br/>sirindhornae</i><br>Sanoamuang,<br>Murugan, Weekers &<br>Dumont, 2000 | 16,887 | NC_026704      | 73              |
|                       |                              |                                                                                              |        |                |                 |
| Chirocephal<br>idae   | <i>Drepanosurus</i>          | <i>Drepanosurus uchidai</i><br>(Kikuchi, 1957)                                               | 15,795 | LC633442       |                 |
|                       |                              | <i>Drepanosurus<br/>hatanakai</i> Takahashi<br>& Hamasaki, in<br>Takahashi et al., 2018      | 17,006 | LC633440       | 35              |
|                       |                              | <i>Drepanosurus<br/>asanumai</i> Takahashi,<br>in Takahashi et al.,<br>2018                  | 17,503 | LC633438       |                 |
|                       | <i>Eubbranchipus</i>         | <i>Eubbranchipus grubii</i><br>(Dybowski, 1860)                                              | 16,328 | MT410793       | No<br>reference |
|                       | <i>Branchinecta</i>          | <i>Branchinecta gaini</i><br>Daday, 1910                                                     | 15,536 | MZ265218       | 74              |
| Branchinecti<br>dae   |                              | <i>Branchinecta paludosa</i><br>(O. F. Müller 1788)                                          | 16,059 | MZ853171       | No<br>reference |
| Artemiidae            | <i>Artemia</i>               | <i>Artemia franciscana</i><br>Kellogg, 1906                                                  | 15,822 | NC_001620      | 75              |
|                       |                              | <i>Artemia urmiana</i><br>Gunther, 1899                                                      | 15,945 | NC_021382      | 76              |
|                       |                              | <i>Artemia tibetiana</i><br>Abatzopoulos,<br>Zhang & Sorgeloos,<br>1998                      | 15,742 | NC_021383      | 76              |
|                       |                              | <i>Artemia sinica</i> Cai,<br>1989                                                           | 15,689 | MK069595       | 77              |
|                       |                              | <i>Artemia salina</i><br>(Linnaeus, 1758)                                                    | 15,826 | MT495441       | 78              |
|                       |                              | <i>Artemia persimilis</i><br>Piccinelli &<br>Prosdocimi, 1968                                | 15,436 | MZ199176       | 79              |
|                       |                              |                                                                                              |        |                |                 |
|                       |                              |                                                                                              |        |                |                 |
| Limnadiidae           | <i>Limnadia</i>              | <i>Limnadia lenticularis</i><br>(Linnaeus, 1761)                                             | 15,151 | MH618637       | 80              |
|                       | <i>Gondwanalim<br/>nadia</i> | <i>Gondwanalimnadia</i> sp.                                                                  | 15,661 | MN625703.<br>1 | 72              |

|                    |                        |                                                    |        |            |    |
|--------------------|------------------------|----------------------------------------------------|--------|------------|----|
|                    | <i>Leptestheria</i>    | <i>Leptestheria brevirostris</i> Barnard, 1924     | 15,579 | MN548772.1 | 81 |
| Triopsidae         | <i>Triops</i>          | <i>Triops cancriformis</i> (Bosc, 1801)            | 15,101 | NC_004465  | 82 |
|                    |                        | <i>Triops australiensis</i> (Spencer & Hall, 1896) | 15,125 | NC_024439  | 83 |
|                    |                        | <i>Triops longicaudatus</i> (LeConte, 1846)        | 15,060 | KM516710   | 84 |
|                    |                        | <i>Triops longicaudatus</i> (LeConte, 1846)        | 15,058 | KM516711   | 85 |
|                    |                        | <i>Triops longicaudatus</i> (LeConte, 1846)        | 15,115 | GU475465   | 85 |
|                    |                        | <i>Triops granarius</i> (Lucas, 1864)              | 15,121 | MF496656   | 39 |
|                    |                        | <i>Lepidurus apus</i> (Linnaeus, 1758)             | 14,754 | NC_044646  | 33 |
|                    |                        | <i>Lepidurus arcticus</i> (Pallas, 1793)           | 14,807 | NC_044654  |    |
| Hutchinsoniellidae | <i>Hutchinsoniella</i> | <i>Hutchinsoniella macracantha</i> Sanders, 1955   | 16,491 | AY456189   | 86 |
| Squillidae         | <i>Squilla</i>         | <i>Squilla biformis</i> Bigelow, 1891              | 15,688 | MW867305   | 87 |
