# Supplementary material for: Conflicts in Mitochondrial Phylogenomics of Branchiopoda, with the First Complete Mitogenome of Laevicaudata (Crustacea: Branchiopoda)
Source: MDPI journal article supplement (doi:10.3390/cimb45020054), 2023-01-18
Supplement: s1 [file s1]

**Table S4.** Results of the test for substitution saturation.

| Gene        | Partition  | <i>I</i> <i>ss</i> | <i>I</i> <i>ss.c</i> | <i>p</i> score | Aligned length | C   | V   | Pi  | S  |
|-------------|------------|--------------------|----------------------|----------------|----------------|-----|-----|-----|----|
| <i>nd2</i>  | <i>1st</i> | 1.03               | 0.69                 | 0.00           | 353            | 25  | 326 | 297 | 25 |
|             | <i>2nd</i> | 0.91               | 0.69                 | 0.00           | 353            | 50  | 301 | 252 | 49 |
| <i>cox1</i> | <i>1st</i> | 0.26               | 0.70                 | 0.00           | 514            | 320 | 192 | 168 | 24 |
|             | <i>2nd</i> | 0.13               | 0.70                 | 0.00           | 514            | 430 | 82  | 66  | 16 |
| <i>cox2</i> | <i>1st</i> | 0.42               | 0.69                 | 0.00           | 228            | 91  | 137 | 124 | 13 |
|             | <i>2nd</i> | 0.22               | 0.69                 | 0.00           | 228            | 145 | 83  | 65  | 18 |
| <i>atp8</i> | <i>1st</i> | 1.18               | 1.16                 | 0.43           | 58             | 8   | 49  | 48  | 1  |
|             | <i>2nd</i> | 1.14               | 1.16                 | 0.92           | 58             | 8   | 49  | 49  | 0  |
| <i>atp6</i> | <i>1st</i> | 0.55               | 0.69                 | 0.02           | 225            | 61  | 163 | 150 | 13 |
|             | <i>2nd</i> | 0.37               | 0.69                 | 0.00           | 225            | 109 | 115 | 101 | 14 |
| <i>cox3</i> | <i>1st</i> | 0.37               | 0.68                 | 0.00           | 264            | 113 | 151 | 126 | 25 |
|             | <i>2nd</i> | 0.25               | 0.68                 | 0.00           | 264            | 79  | 185 | 88  | 97 |
| <i>nd3</i>  | <i>1st</i> | 0.59               | 0.82                 | 0.01           | 121            | 32  | 85  | 83  | 2  |
|             | <i>2nd</i> | 0.38               | 0.82                 | 0.00           | 121            | 47  | 70  | 62  | 8  |
| <i>nd5</i>  | <i>1st</i> | 0.77               | 0.71                 | 0.14           | 582            | 94  | 485 | 459 | 26 |
|             | <i>2nd</i> | 0.65               | 0.71                 | 0.16           | 582            | 154 | 425 | 378 | 47 |
| <i>nd4</i>  | <i>1st</i> | 0.86               | 0.70                 | 0.00           | 453            | 81  | 369 | 355 | 14 |
|             | <i>2nd</i> | 0.75               | 0.70                 | 0.42           | 453            | 129 | 321 | 293 | 28 |
| <i>nd4l</i> | <i>1st</i> | 1.12               | 0.77                 | 0.01           | 114            | 11  | 94  | 89  | 5  |
|             | <i>2nd</i> | 1.09               | 0.77                 | 0.04           | 114            | 20  | 86  | 72  | 13 |
| <i>nd6</i>  | <i>1st</i> | 1.04               | 0.70                 | 0.00           | 179            | 11  | 166 | 157 | 7  |
|             | <i>2nd</i> | 0.99               | 0.70                 | 0.01           | 179            | 36  | 141 | 127 | 12 |
| <i>cytb</i> | <i>1st</i> | 0.25               | 0.68                 | 0.00           | 380            | 167 | 212 | 182 | 30 |
|             | <i>2nd</i> | 0.22               | 0.68                 | 0.00           | 380            | 241 | 138 | 102 | 36 |
| <i>nd1</i>  | <i>1st</i> | 0.67               | 0.68                 | 0.87           | 320            | 90  | 225 | 205 | 16 |
|             | <i>2nd</i> | 0.52               | 0.68                 | 0.03           | 320            | 128 | 187 | 149 | 32 |

*I**ss*: estimated index of substitution saturation for the data set. *I**ss.c*: critical values for the index of substitution saturation. *I**ss* > *I**ss.c* ( $P < 0.05$ ) indicates saturation. C: conserved sites, V: variable sites Pi: parsimony informative sites, S: singleton sites, 1st: the first codon position, 2nd: the second codon position.
