# Supplementary material for: Conflicts in Mitochondrial Phylogenomics of Branchiopoda, with the First Complete Mitogenome of Laevicaudata (Crustacea: Branchiopoda)
Source: Curr Issues Mol Biol. 2023 Jan 18;45(2):820–37. doi: 10.3390/cimb45020054 (PMC9955068; doi:10.3390/cimb45020054)
Supplement: Supplementary file 1 [file cimb-45-00054-s001.zip]

Archive with 6 entries (6 files):
- FIGS1 Phylogenetic trees with RAxML and MrBayes inferred from Pnuc6 and Paa7.jpg
- Figure S1 Caption.pdf
- Table S1 Primers of Lynceus grossipedia.pdf
- Table S2 Details of species and mitogenomes of Branchiopoda.pdf
- Table S3 Partitions&models.pdf
- Table S4 substitution saturation test for individual genes.pdf
